# Supplementary material for: Kinetic aspects of formation and processing of polycaprolactone polyurethanes in situ from a blocked isocyanate
Source: Royal Society of Chemistry journal article supplement (doi:10.1039/c7py02006f), 2018-01-01
Supplement: c7py02006f1.pdf [file c7py02006f1.pdf]

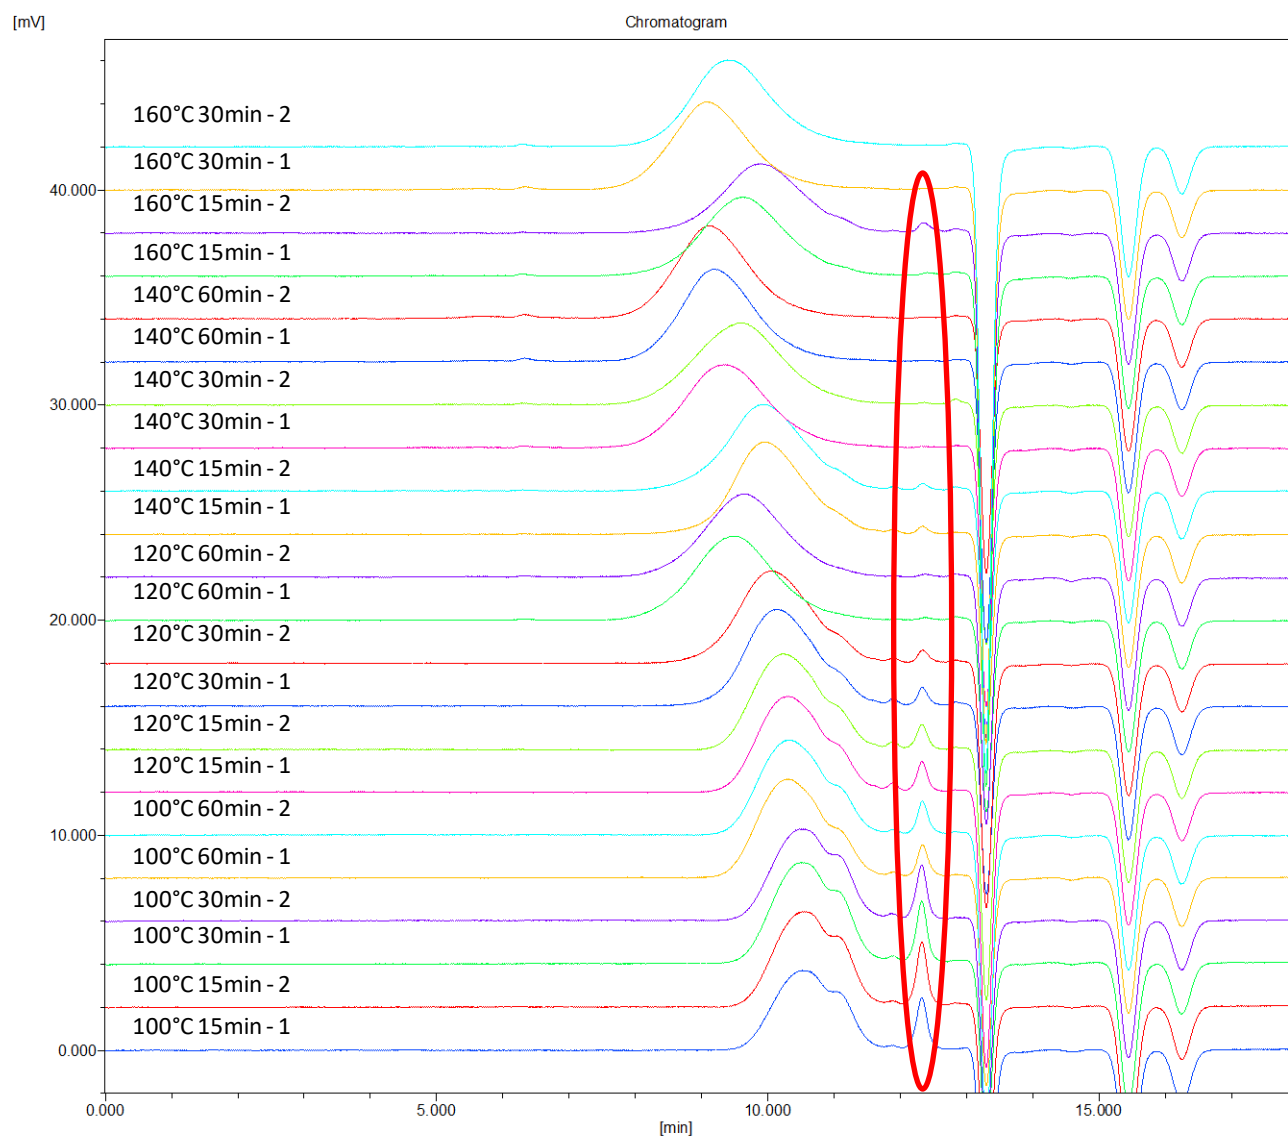

**Figure S1** Gel permeation chromatogram elution curve overlay of PU-PCL50-AO heated at various temperatures for various times showing different stages of polymer formation; note that at the lower temperatures the curves are clearly bimodal reflecting considerable amounts of low molecular species; the area highlighted in red shows the disappearance of MDI-AO

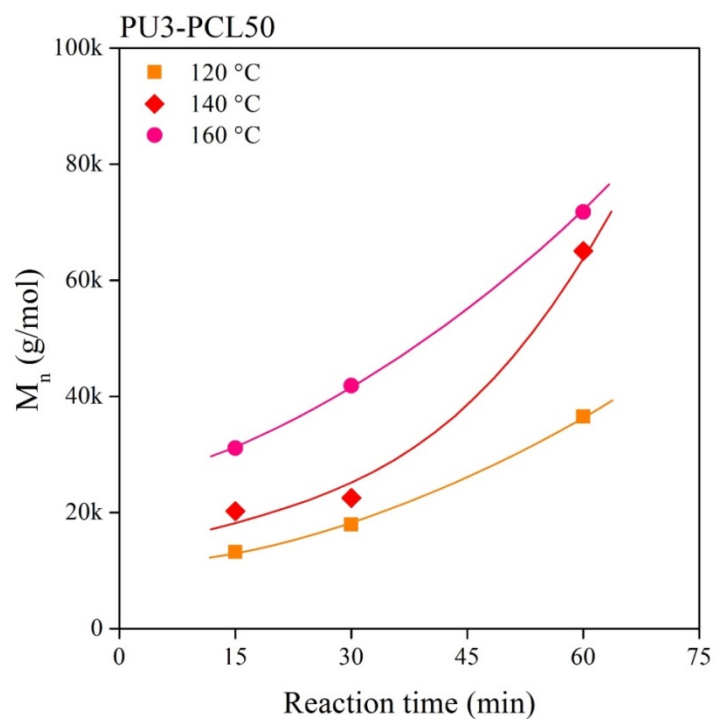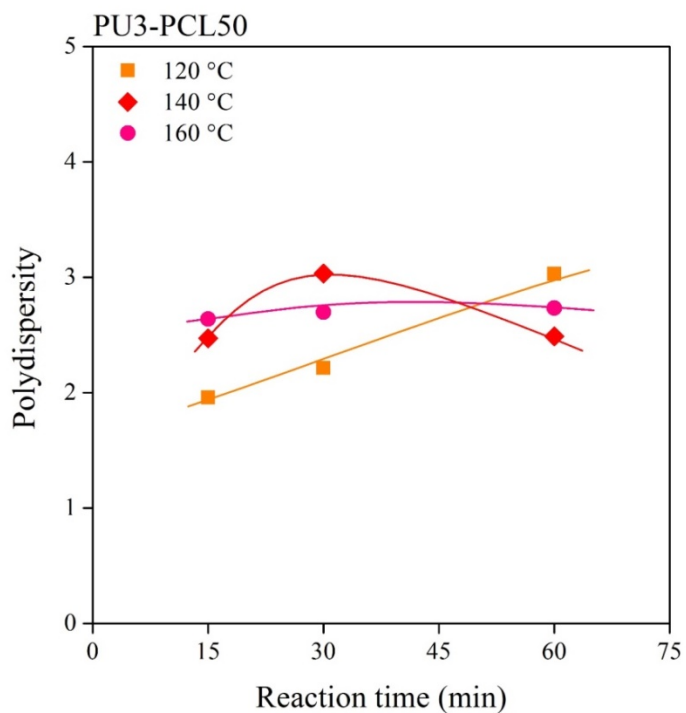

**Figure S2** **a)** shows the number average molecular weight ( $M_n$ ) of PU-PCL50-AO as a function of both reaction time and temperature. It is evident from the plot that the molecular weight increases only slightly as a function of time below 120°C. The highest molecular weights were obtained for 60 min at 140°C and 60 min at 160°C; **b)** illustrates the PDI differences observed with reaction time and temperature

Sample: PU-PCL50 140C 60min- Size:  
5.5716 x 8.6300 x 0.1200 mm Method:  
Strain Sweep

DMA

File: PU-PCL50-AO 5percSnOct2 140C 60min-2 ...  
Operator: Balázs  
Run Date: 29-Apr-2015 14:18  
Instrument: DMA Q800 V20.24 Build 43

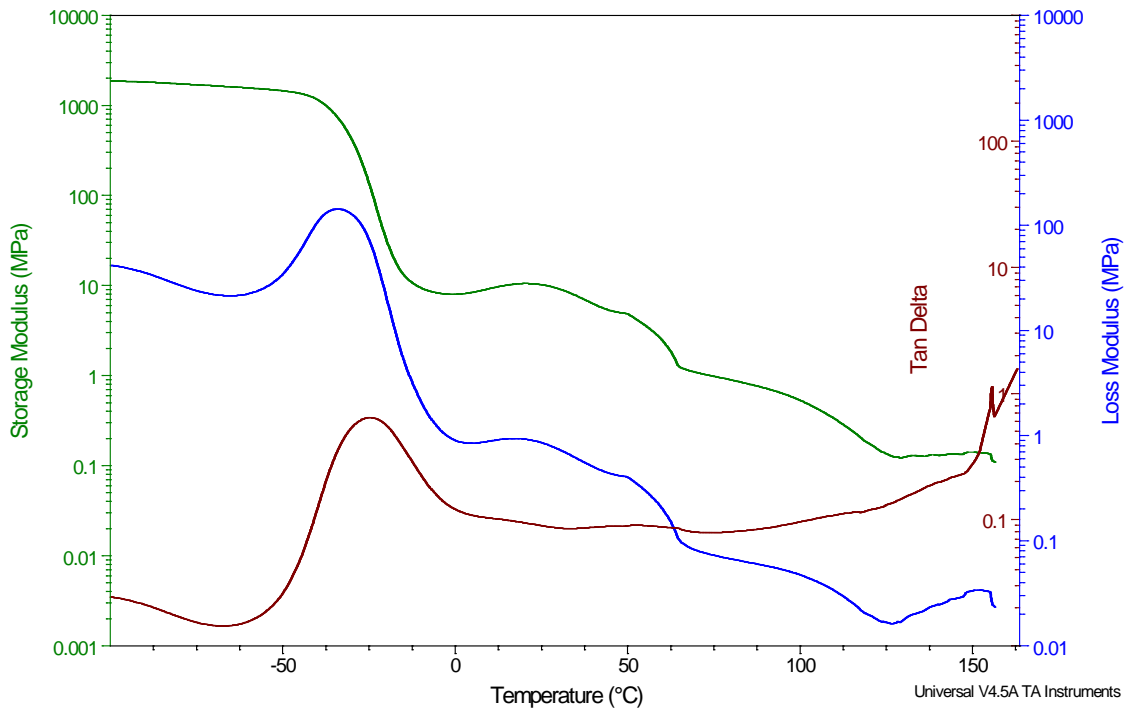

**Figure S3** Dynamic mechanical analysis (DMA) data for PU-PCL50-AO polymerized at 140°C for 60 minutes; the low temperature loss peak signifies T<sub>g</sub> of the soft phase ; the increase in storage modulus above 0°C is associated with modest cold crystallization within the PCL phase; crystallinity in the this is followed by melting of PCL crystallinity at ~ 50°C; The event at ~125°C is probably due to the disruption of inter-urethane hydrogen bonds

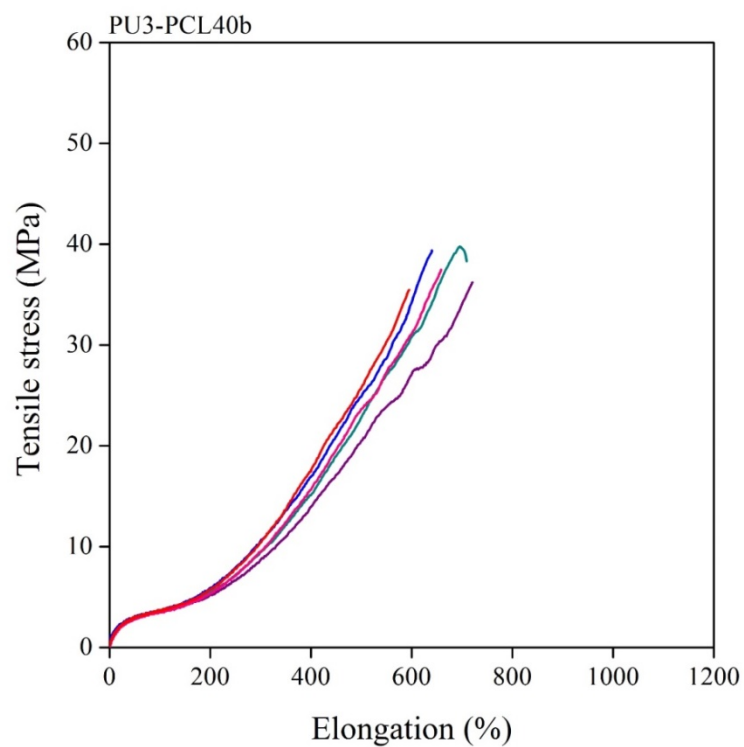

**Figure S4** Tensile stress-elongation data for unblocked PU-PCL40 PU film polymerized at 140°C for 60 min; Film composition is 40 % PCL based on -OH content; results were obtained for 5 samples at room temperature, extension rate 50 mm/min
